# Supplementary material for: Statistically Designed Medium Reveals Interactions between Metabolism and Genetic Information Processing for Production of Stable Human Serum Albumin in Pichia pastoris
Source: PubMed Central journal article supplement (PMC6843683; doi:10.3390/biom9100568), 2019-10-04
Supplement: biomolecules-09-00568-s001.pdf [file biomolecules-09-00568-s001.pdf]

# Statistically Designed Medium Reveals Interactions Between Metabolism and Genetic information Processing for Production of Stable Human Serum Albumin in *Pichia pastoris*

Nitu Maity and Saroj Mishra \*

Department of Biochemical Engineering and Biotechnology, Indian Institute of Technology Delhi, Hauz-Khas, New-Delhi 110016; nitumaity@gmail.com

\* Correspondence: saroj98@hotmail.com; Tel.: 91-011-2659-1007

## Index

|                                                                                                                                                                                                                                                                                                                                                                                                                                                                                                                                                                                                                                     |               |
|-------------------------------------------------------------------------------------------------------------------------------------------------------------------------------------------------------------------------------------------------------------------------------------------------------------------------------------------------------------------------------------------------------------------------------------------------------------------------------------------------------------------------------------------------------------------------------------------------------------------------------------|---------------|
| <b>Figures</b>                                                                                                                                                                                                                                                                                                                                                                                                                                                                                                                                                                                                                      | <b>Pg 3-7</b> |
| <b>1. Bioinformatics workflow</b>                                                                                                                                                                                                                                                                                                                                                                                                                                                                                                                                                                                                   | <b>Pg 3</b>   |
| Figure S1: Bioinformatics workflow                                                                                                                                                                                                                                                                                                                                                                                                                                                                                                                                                                                                  | Pg 3          |
| <b>2. Screening of 2-copy constructs for production of stable HSA</b>                                                                                                                                                                                                                                                                                                                                                                                                                                                                                                                                                               | <b>Pg 3</b>   |
| Figure S2. SDS-PAGE analysis of culture filtrate produced by 2-copy constructs. (a) Lanes 1-6: Clone # s are shown above the lane numbers. Lane 7: 1-copy construct, Lane 8: Commercial HSA producing clone (com), Lane 9: commercial HSA, Lane 10: molecular weight ladder. (b) Lanes 1-6: Clone # s are shown above the lane numbers. Lane 7: 1-copy construct, Lane 8: Commercial HSA producing clone (com), Lane 9: molecular weight ladder, Lane 10: commercial HSA (c) Lanes 1-7: Clone # s are shown above the lane numbers. Lane 8: 1-copy construct, Lane 9: Commercial HSA producing clone (com), Lane 10: commercial HAS | Pg 3          |
| <b>3. Unigenes identified based on Gene Ontology</b>                                                                                                                                                                                                                                                                                                                                                                                                                                                                                                                                                                                | <b>Pg 4</b>   |
| Figure S3. (a) Classification of genes based on Gene Ontology, b) WEGO plot showing GO for Unigenes.                                                                                                                                                                                                                                                                                                                                                                                                                                                                                                                                | Pg 4          |
| <b>4. CDS identified based on Gene Ontology</b>                                                                                                                                                                                                                                                                                                                                                                                                                                                                                                                                                                                     | <b>Pg 5</b>   |
| Figure S4. (a) Classification of CDS transcripts base on gene ontology IDs, (b) WEGO plot showing GO for CDS sequences.                                                                                                                                                                                                                                                                                                                                                                                                                                                                                                             | Pg 5          |
| <b>5. Volcanic plot representation of up- and down-regulated genes.</b>                                                                                                                                                                                                                                                                                                                                                                                                                                                                                                                                                             | <b>Pg 6</b>   |
| Figure S5. Volcanic plot representing differentially expressed genes.                                                                                                                                                                                                                                                                                                                                                                                                                                                                                                                                                               | Pg 6          |

**6. Percent distribution of up- and down-regulated genes. Pg 7**

**Figure S6.** (a) Percentage distribution of up- and down-regulated genes (cut-off p values < 0.05) mapped to their respective GO biological pathways (KEGG pathways) (b) Venn diagram representing genes up- or down-regulated or expressed under both conditions. (c) List of exclusively up- and down-regulated genes. (d) Number of up-, down-regulated and genes expressed under both the conditions.

Pg 7

**Tables Pg 8-17**

**Table S1** Design of Experiments (DOE) using Plackett-Burman methodology (unit for temperature is degrees Celsius, inoculum is O.D. units, where 1 O.D<sub>600</sub> unit corresponds to approximately 10<sup>7</sup>cells/ml, sorbitol and peptone are in percentage (w/v), methanol in percentage (v/v). Pg 8

**Table S2** Design of experiments (DOE) using Central Composite Design methodology (CCD).

Pg 9

**Table S3** Codon usage table of cloned HSA

Pg 10

**Table S4** Regression statistics and ANOVA for Plackett-Burman design

Pg 11

**Table S5** Analysis of variance (ANOVA) for Quadratic model obtained from Face centered CCD

Pg 12

**Table S6** KEGG pathway classification of genes transcribed under optimized and un-optimized conditions

Pg 13

**Table S7** A comparison of the up- and down- regulated genes obtained from studies involving methanol metabolism [54], temperature [65] and present study.

Pg 14

## 1. Bioinformatics Flowchart

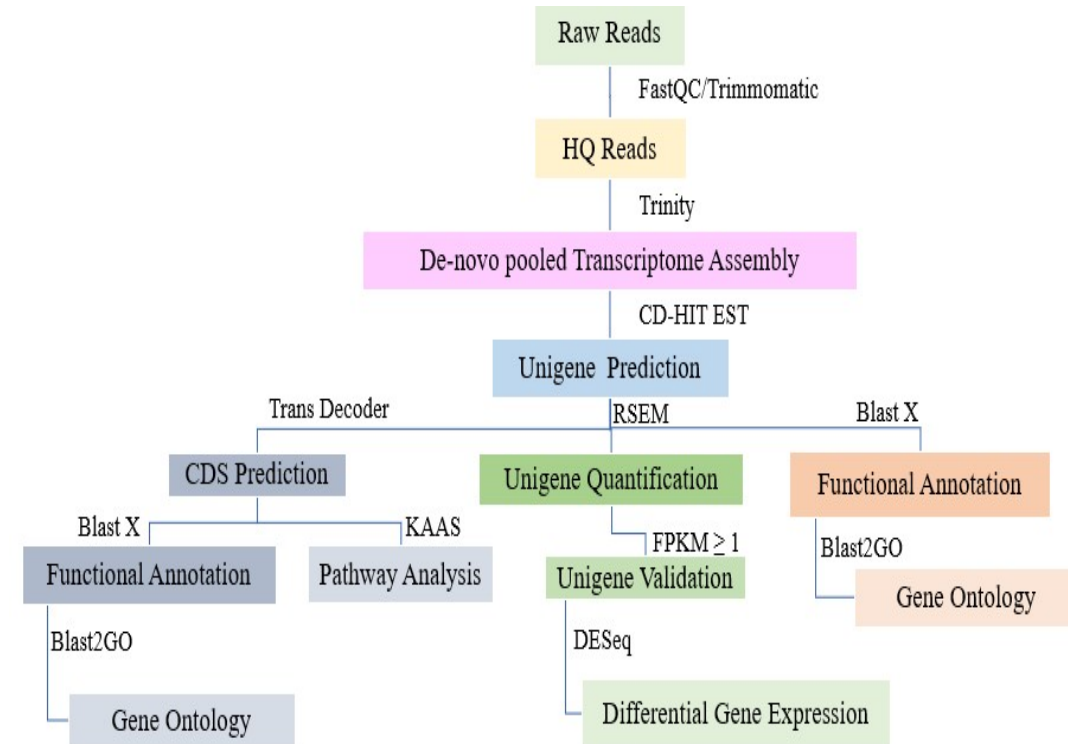

**Figure S1.** Bioinformatics workflow.

## 2. Screening of 2-copy constructs for production of stable HSA

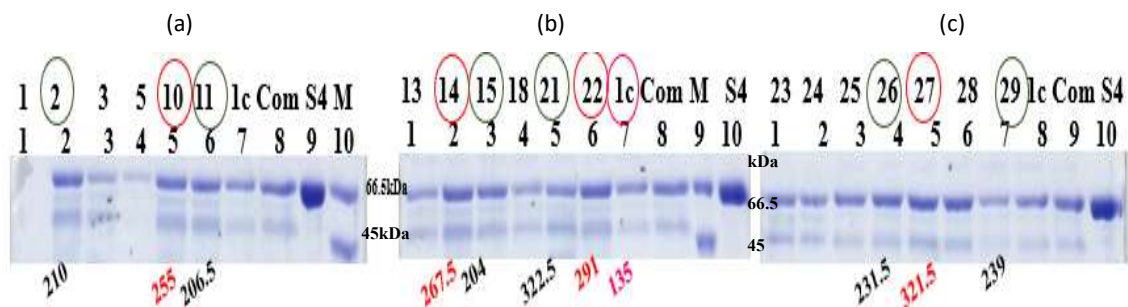

**Figure S2.** SDS-PAGE analysis of culture filtrate produced by 2-copy constructs. (a) Lanes 1-6: Clone #s are shown above the lane numbers. Lane 7: 1-copy construct, Lane 8: Commercial HSA producing clone (com), Lane 9: commercial HSA, Lane 10: molecular weight ladder. (b) Lanes 1-6: Clone #s are shown above the lane numbers. Lane 7: 1-copy construct, Lane 8: Commercial HSA producing clone (com), Lane 9: molecular weight ladder, Lane 10: Commercial HSA. (c) Lanes 1-7: Clone #s are shown above the lane numbers. Lane 8: 1-copy construct, Lane 9: Commercial HSA producing clone (com), Lane 10: Commercial HSA.

### 3. Unigenes identified based on Gene Ontology

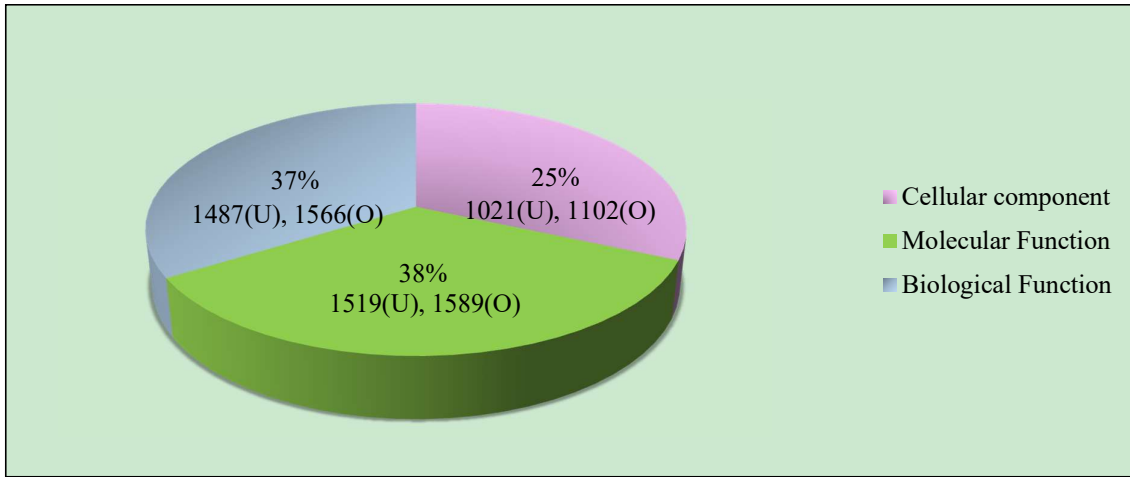

Figure S3. (a) Classification of genes based on Gene Ontology

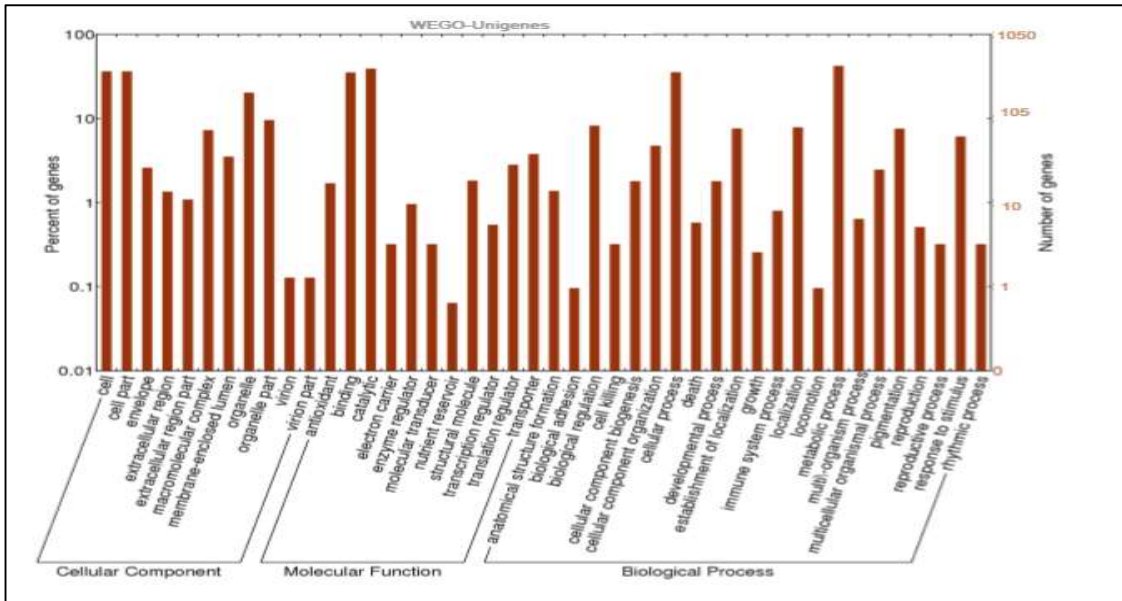

Figure S3. (b) WEGO plot showing GO for Unigenes.

#### 4. CDS identified based on Gene Ontology

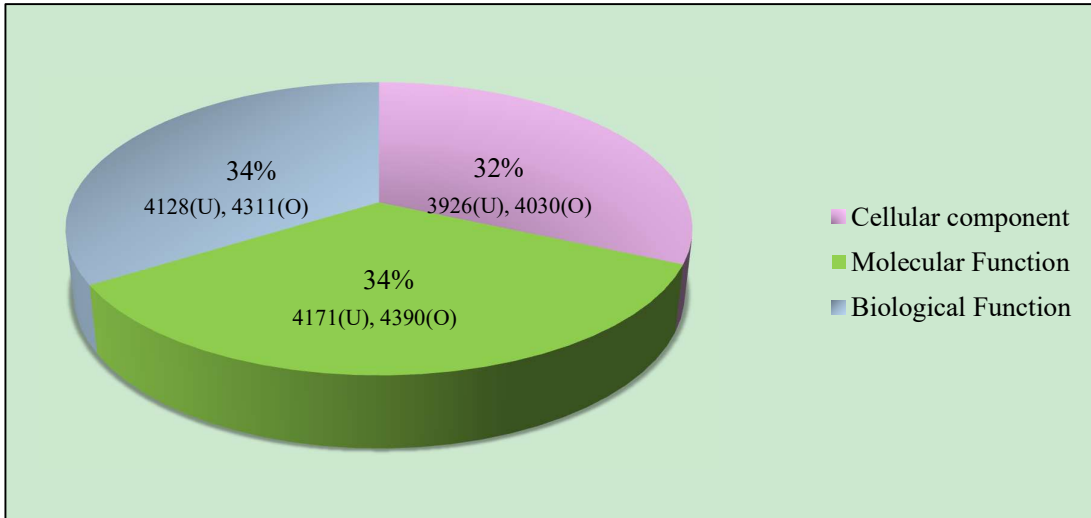

Figure S4. (a) Classification of CDS transcripts base on gene ontology GO IDs.

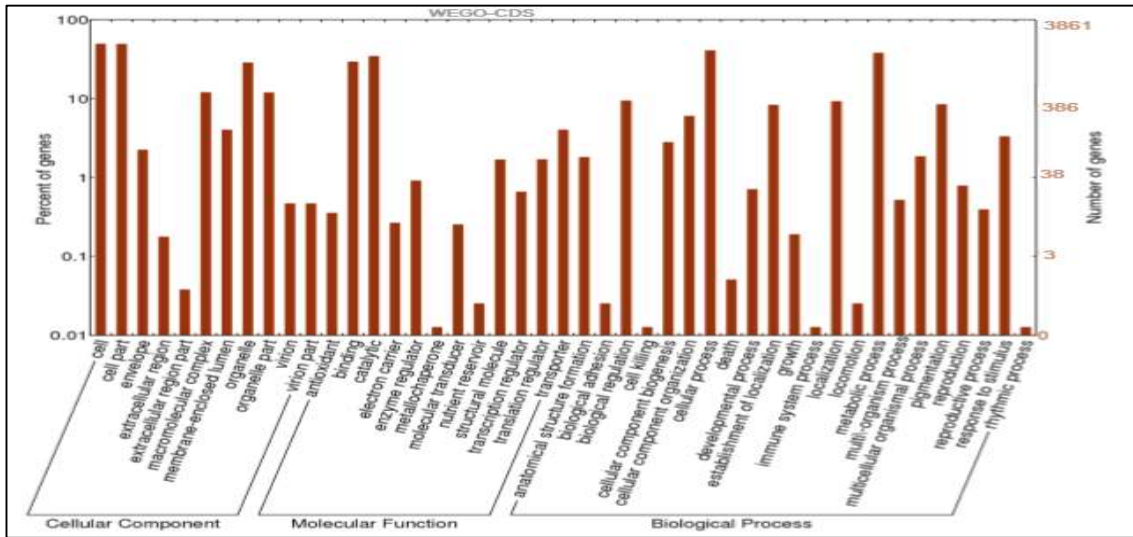

Figure S4. (b) WEGO plot showing GO for CDS sequences.

5. Volcanic plot representation of up- and down-regulated genes.

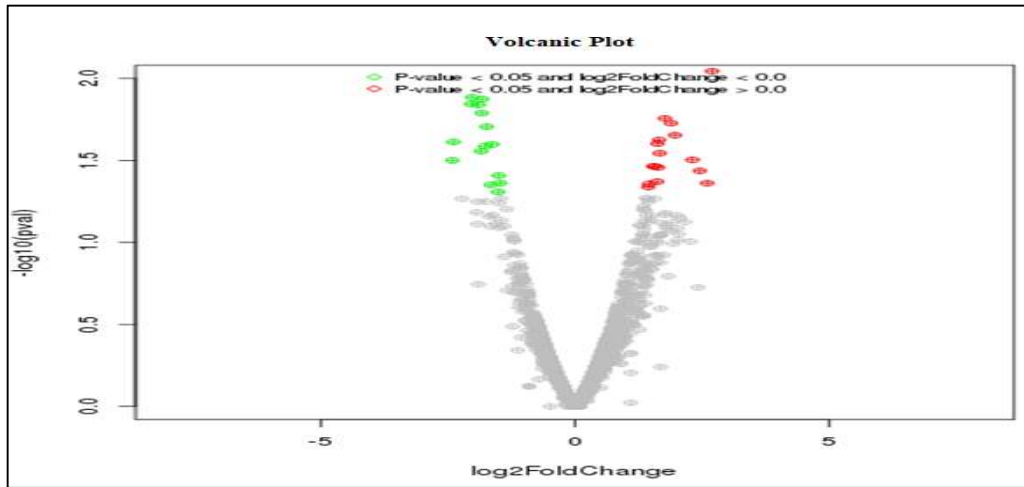

Figure S5. Volcanic plot representing differentially expressed genes.

## 6. Percentage distribution of up- and down-regulated genes.

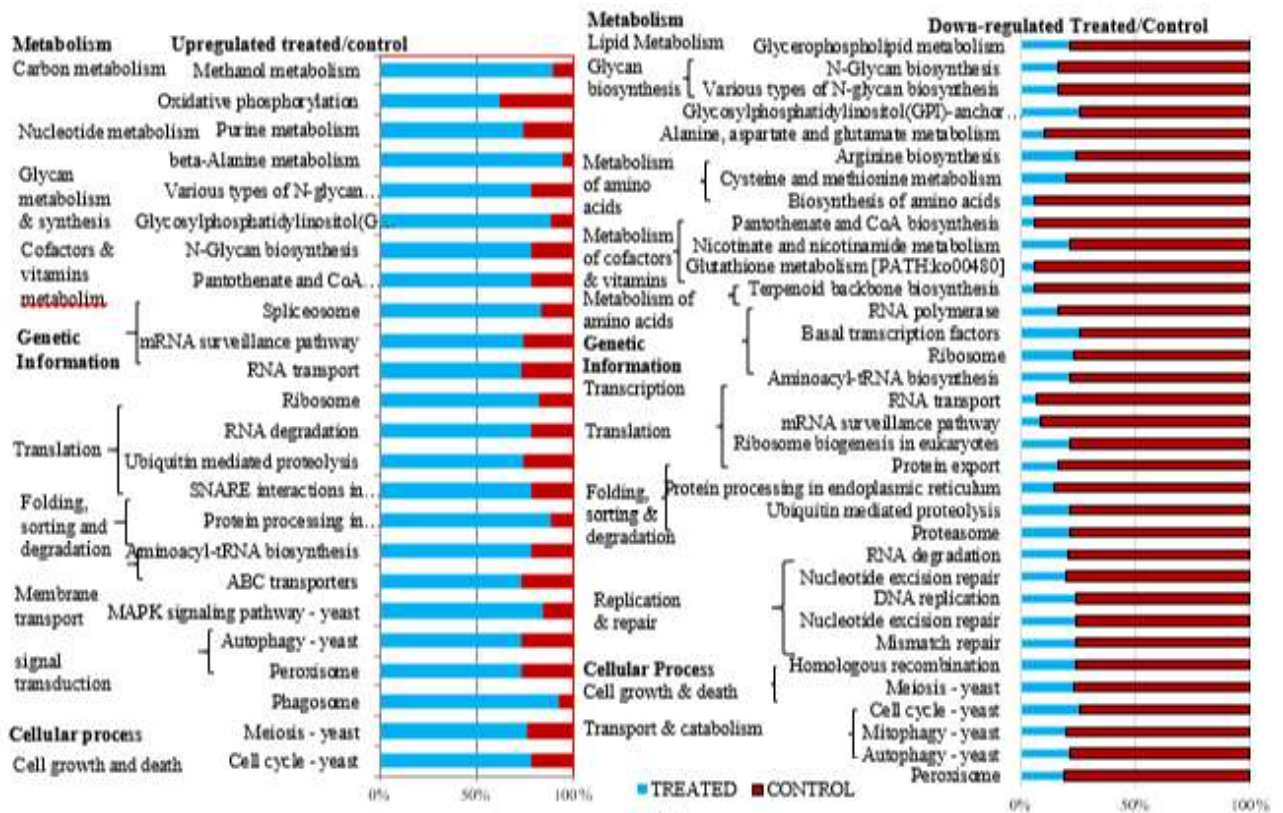

(a)

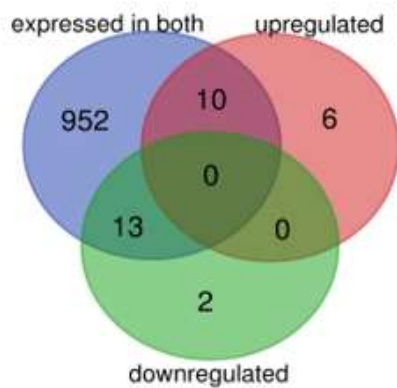

(b)

|                           |   |                                                                                                                                                                                                                                                                                                                                                                                                                                                           |
|---------------------------|---|-----------------------------------------------------------------------------------------------------------------------------------------------------------------------------------------------------------------------------------------------------------------------------------------------------------------------------------------------------------------------------------------------------------------------------------------------------------|
| Exclusively upregulated   | 6 | <ul style="list-style-type: none"> <li>Mitochondrial alcohol dehydrogenase isozyme III</li> <li>(hydroxymethyl)glutathione dehydrogenase</li> <li>Plasma membrane ATP-binding cassette (ABC) transporter required for the export of <math>\alpha</math>- catalyze</li> <li>SEA (Sch1-associated) complex subunit</li> <li>Translation elongation factor EF-1 gamma</li> <li>Plasma membrane localized that protects membranes from desiccation</li> </ul> |
| Exclusively downregulated | 2 | <ul style="list-style-type: none"> <li>Alternative oxidase</li> <li>Heat Shock Hsp90</li> </ul>                                                                                                                                                                                                                                                                                                                                                           |

(c)

| List names                     | number of genes | number of unique genes |
|--------------------------------|-----------------|------------------------|
| expressed in both              | 975             | 975                    |
| downregulated                  | 15              | 15                     |
| upregulated                    | 16              | 16                     |
| Overall number of unique genes |                 | 983                    |

(d)

**Figure S6.** (a) Percentage distribution of up- and down-regulated genes (cut-off p values < 0.05) mapped to their respective GO biological pathways (KEGG pathways) (b) Venn diagram representing genes up- or down-regulated or expressed under both conditions. (c) List of exclusively up- and down-regulated genes. (d) Number of up-, down-regulated and genes expressed under both the conditions.

**Table S2** Design of Experiments (DOE) using Plackett-Burman methodology (unit for temperature is degrees Celsius, inoculum is O.D. units, where 1 O.D<sub>600</sub> unit corresponds to approximately 10<sup>7</sup> cells/ml, Sorbitol and peptone are in percentage (w/v), methanol in percentage (v/v).

| Run                           | Temp (°C) | Inoculum | pH   | Sorbitol (%) | MeOH (%) | RPM  | Peptone (%) | Dummy variables |    |    |    | HSA produced (mg/L) |           |
|-------------------------------|-----------|----------|------|--------------|----------|------|-------------|-----------------|----|----|----|---------------------|-----------|
|                               |           |          |      |              |          |      |             |                 |    |    |    | Actual              | Predicted |
| 1                             | 22        | 10       | 7    | 0.5          | 2        | 250  | 4           | -1              | -1 | -1 | 1  | 275±1.12            | 275.32    |
| 2                             | 22        | 10       | 6    | 1            | 2        | 220  | 4           | 1               | 1  | -1 | -1 | 267±0.87            | 267.26    |
| 3                             | 28        | 10       | 7    | 0.5          | 1        | 220  | 4           | -1              | 1  | 1  | -1 | 244±0.94            | 244.07    |
| 4                             | 28        | 1        | 7    | 1            | 1        | 250  | 4           | 1               | -1 | -1 | -1 | 243±1.31            | 243.42    |
| 5                             | 22        | 1        | 6    | 1            | 1        | 250  | 4           | -1              | 1  | 1  | 1  | 257±1.26            | 256.69    |
| 6                             | 28        | 1        | 6    | 0.5          | 2        | 220  | 4           | 1               | -1 | 1  | 1  | 258±0.95            | 258.49    |
| 7                             | 28        | 10       | 6    | 1            | 2        | 250  | 2           | -1              | -1 | 1  | -1 | 262±1.24            | 263.36    |
| 8                             | 22        | 1        | 6    | 0.5          | 1        | 220  | 2           | -1              | -1 | -1 | -1 | 274±0.68            | 275.00    |
| 9                             | 22        | 10       | 7    | 1            | 1        | 220  | 2           | 1               | -1 | 1  | 1  | 270±0.78            | 270.49    |
| 10                            | 28        | 1        | 7    | 1            | 2        | 220  | 2           | -1              | 1  | -1 | 1  | 272±1.38            | 271.64    |
| 11                            | 28        | 10       | 6    | 0.5          | 1        | 250  | 2           | 1               | 1  | -1 | 1  | 254±1.24            | 253.44    |
| 12                            | 22        | 1        | 7    | 0.5          | 2        | 250  | 2           | 1               | 1  | 1  | -1 | 293±1.38            | 292.98    |
| % contribution of each factor | 40.13     | 2.22     | 2.11 | 2.63         | 27.75    | 0.01 | 25.06       |                 |    |    |    |                     |           |



**Table S2** Design of Experiments (DOE) using Central Composite Design methodology (CCD).

| Run | X <sub>1</sub> : Temperature<br>(°C) |        | X <sub>2</sub> : Methanol<br>(%) |        | X <sub>3</sub> : Peptone<br>(%) |        | Y*<br>HSA produced (mg/L) |          |
|-----|--------------------------------------|--------|----------------------------------|--------|---------------------------------|--------|---------------------------|----------|
|     | Coded                                | Actual | Coded                            | Actual | Coded                           | Actual | Predicted                 | Actual   |
| 1   | 0                                    | 24     | 0                                | 1.5    | 0                               | 3      | 344.99                    | 336±0.93 |
| 2   | -1                                   | 20     | 1                                | 2      | 1                               | 4      | 232.36                    | 235±0.85 |
| 3   | 0                                    | 24     | -1.68                            | 0.66   | 0                               | 3      | 265.22                    | 268±0.96 |
| 4   | 1                                    | 28     | -1                               | 1      | 1                               | 4      | 235.31                    | 238±0.84 |
| 5   | 0                                    | 24     | 0                                | 1.5    | 0                               | 3      | 344.99                    | 345±0.86 |
| 6   | 1                                    | 28     | 1                                | 2      | 1                               | 4      | 232.13                    | 235±1.14 |
| 7   | 0                                    | 24     | 0                                | 1.5    | 0                               | 3      | 344.99                    | 350±1.17 |
| 8   | 0                                    | 24     | 1.68                             | 2.3    | 0                               | 3      | 238.00                    | 235±0.87 |
| 9   | 0                                    | 24     | 0                                | 1.5    | 0                               | 3      | 344.99                    | 342±1.21 |
| 10  | -1.68                                | 17.3   | 0                                | 1.5    | 0                               | 3      | 300.15                    | 303±1.02 |
| 11  | 1.68                                 | 30.7   | 0                                | 1.5    | 0                               | 3      | 261.07                    | 258±1.24 |
| 12  | -1                                   | 20     | 1                                | 2      | -1                              | 2      | 293.53                    | 291±1.11 |
| 13  | 0                                    | 24     | 0                                | 1.5    | -1.68                           | 1.3    | 307.64                    | 311±0.94 |
| 14  | 0                                    | 24     | 0                                | 1.5    | 1.68                            | 4.7    | 221.58                    | 218±1.34 |
| 15  | 0                                    | 24     | 0                                | 1.5    | 0                               | 3      | 344.99                    | 350±1.38 |
| 16  | 0                                    | 24     | 0                                | 1.5    | 0                               | 3      | 344.99                    | 347±0.92 |
| 17  | -1                                   | 20     | -1                               | 1      | 1                               | 4      | 241.05                    | 239±0.89 |
| 18  | 1                                    | 28     | 1                                | 2      | -1                              | 2      | 252.80                    | 255±1.62 |
| 19  | -1                                   | 20     | -1                               | 1      | -1                              | 2      | 322.72                    | 320±1.24 |
| 20  | 1                                    | 28     | -1                               | 1      | -1                              | 2      | 276.48                    | 274±1.67 |

\*Y: Response was measured in terms of production of HSA as observed by gel densitometry on SDS-PAGE.

**Table S3** Codon usage table of cloned HSA

| Codon | Number | /1000 | Codon | Number | /1000 | Codon | Number | /1000 |
|-------|--------|-------|-------|--------|-------|-------|--------|-------|
| GCG   | 1.00   | 1.48  | ATA   | 1.00   | 1.48  | AGG   | 3.00   | 4.44  |
| GCA   | 20.00  | 29.59 | ATT   | 6.00   | 8.88  | AGA*  | 13.00  | 19.23 |
| GCT   | 28.00  | 41.42 | ATC   | 8.00   | 11.83 | CGG   | 1.00   | 1.48  |
| GCC   | 26.00  | 38.46 |       |        |       | CGA   | 2.00   | 2.96  |
|       |        |       |       |        |       | CGT   | 5.00   | 7.40  |
|       |        |       |       |        |       | CGC   | 2.00   | 2.96  |
| TGT   | 23.00  | 34.02 | TTG   | 26.00  | 38.46 | AGT   | 3.00   | 4.44  |
| TGC   | 12.00  | 17.75 | TTA   | 9.00   | 13.31 | AGC   | 3.00   | 4.44  |
|       |        |       | CTA   | 5.00   | 7.40  | TCG   | 1.00   | 1.48  |
|       |        |       | CTT   | 10.00  | 14.79 | TCA   | 5.00   | 7.40  |
|       |        |       | CTC   | 3.00   | 4.44  | TCT   | 12.00  | 17.75 |
|       |        |       | CTG   | 15.00  | 22.19 | TCC   | 8.00   | 11.83 |
| GAT   | 26.00  | 38.46 | ATG   | 7.00   | 10.36 | ACG   | 3.00   | 4.44  |
| GAC   | 14.00  | 20.71 |       |        |       | ACA   | 8.00   | 11.83 |
|       |        |       |       |        |       | ACT   | 15.00  | 22.19 |
|       |        |       |       |        |       | ACC   | 10.00  | 14.79 |
| GAG   | 35.00  | 51.78 | AAT   | 9.00   | 13.39 | GTG   | 11.00  | 16.27 |
| GAA   | 34.00  | 50.30 | AAC   | 13.00  | 19.23 | GTA   | 5.00   | 7.40  |
|       |        |       |       |        |       | GTT   | 18.00  | 26.63 |
|       |        |       |       |        |       | GTC   | 13.00  | 19.23 |
| TTT   | 18.00  | 26.63 | CCG   | 1.00   | 1.48  | TGG   | 1.00   | 1.48  |
| TTC   | 19.00  | 28.11 | CCA   | 13.00  | 19.23 |       |        |       |
|       |        |       | CCT   | 7.00   | 10.36 |       |        |       |
|       |        |       | CCC   | 7.00   | 10.36 |       |        |       |
| GGG   | 2.00   | 2.96  | CAG   | 9.00   | 13.31 | TAT   | 10.00  | 14.79 |
| GGA   | 7.00   | 10.36 | CAA   | 12.00  | 17.75 | TAC   | 9.00   | 13.31 |
| GGT   | 4.00   | 5.92  |       |        |       |       |        |       |
| GGC   | 3.00   | 4.44  |       |        |       |       |        |       |
| CAT   | 10.00  | 14.79 | AAG   | 29.00  | 42.90 | TGA   | 0.00   | 0.00  |
| CAC   | 8.00   | 11.83 | AAA   | 32.00  | 47.34 | TAG   | 1.00   | 1.48  |
|       |        |       |       |        |       | TAA   | 1.00   | 2.96  |

\*Bias for certain codons is indicated in red font.

**Table S4** Regression statistics and ANOVA for Plackett-Burman design

| Source          | Sum of Squares | Df | Mean Square | Coefficient estimate | Standardized Effect | % contribution | F-value | t-stat | p-value |
|-----------------|----------------|----|-------------|----------------------|---------------------|----------------|---------|--------|---------|
| Model/Intercept | 2214.97        | 7  | 316.42      | 264.35               |                     |                | 33.47   |        | 0.0022* |
| Temperature     | 889.76         | 1  | 889.76      | -8.61                | -17.22              | 40.13          | 123.37  | 40.2   | 0.0004* |
| Inoculum        | 49.09          | 1  | 49.09       | -2.02                | -4.045              | 2.22           | 0.8743  | 9.29   | 0.4027  |
| pH              | 46.69          | 1  | 46.69       | 1.97                 | 3.945               | 2.11           | 0.5390  | 9.12   | 0.5036  |
| Sorbitol        | 58.30          | 1  | 58.30       | -2.20                | -4.41               | 2.63           | 5.35    | 9.89   | 0.0817  |
| Methanol        | 615.33         | 1  | 615.33      | 7.16                 | 14.32               | 27.75          | 55.82   | 32.1   | 0.0017* |
| RPM             | 0.2494         | 1  | 0.2494      | -0.1442              | -0.288              | 0.01           | 0.0943  | 1.02   | 0.7741  |
| Peptone         | 555.56         | 1  | 555.56      | -6.80                | -13.61              | 25.06          | 48.26   | 31.8   | 0.0023* |
| Residual        | 2.18           | 4  | 0.5454      |                      |                     |                |         |        |         |
| Cor Total       | 2217.15        | 11 |             |                      |                     |                |         |        |         |

Df: Degree of freedom, F: Fischer's function, t-stat: Student's t-test, p value: Level of significance, \* refers to significant values

#### Fit Statistics

|           |        |                          |         |
|-----------|--------|--------------------------|---------|
| Std. Dev. | 5.04   | R <sup>2</sup>           | 0.9940  |
| Mean      | 287.50 | Adjusted R <sup>2</sup>  | 0.9886  |
| C.V. %    | 1.75   | Predicted R <sup>2</sup> | 0.9750  |
|           |        | Adeq Precision           | 34.6393 |

**The correlation coefficient (R) is 0.996.** The Predicted R<sup>2</sup> of 0.9750 is in reasonable agreement with the Adjusted R<sup>2</sup> of 0.9886; i.e. the difference is less than 0.2.

**Table S5** Analysis of variance (ANOVA) for Quadratic model obtained from Face centered CCD

| Source                             | Sum of Squares | Df | Mean Square | F-value | p-value  |
|------------------------------------|----------------|----|-------------|---------|----------|
| <b>Model</b>                       | 41979.14       | 9  | 4664.35     | 183.74  | <0.0001* |
| X <sub>1</sub> - (Temperature, °C) | 1843.73        | 1  | 1843.73     | 72.63   | <0.0001* |
| X <sub>2</sub> - (Methanol, % v/v) | 894.06         | 1  | 894.06      | 35.22   | 0.0001*  |
| X <sub>3</sub> - (Peptone, % w/v)  | 8939.47        | 1  | 8939.47     | 352.14  | <0.0001* |
| X <sub>1</sub> X <sub>2</sub>      | 15.13          | 1  | 15.13       | 0.5958  | 0.4580   |
| X <sub>1</sub> X <sub>3</sub>      | 820.13         | 1  | 820.13      | 32.31   | 0.0002*  |
| X <sub>2</sub> X <sub>3</sub>      | 210.13         | 1  | 210.13      | 8.28    | 0.0165*  |
| X <sub>1</sub> <sup>2</sup>        | 7466.96        | 1  | 7466.96     | 294.14  | <0.0001* |
| X <sub>2</sub> <sup>2</sup>        | 15708.71       | 1  | 15708.71    | 618.79  | <0.0001* |
| X <sub>3</sub> <sup>2</sup>        | 11639.43       | 1  | 11639.43    | 458.50  | <0.0001* |
| <b>Residual</b>                    | 253.86         | 10 | 25.39       |         |          |
| Lack of Fit                        | 109.86         | 5  | 21.97       | 0.7629  | 0.6131   |
| Pure Error                         | 144.00         | 5  | 28.80       |         |          |
| <b>Cor Total</b>                   | 42233.00       | 19 |             |         |          |

\*:Represents significant values, *Df*: Degree of freedom, *F*: Fischer's function, *p*: Level of significance.

The model *F* value of 183.74 implies that the model is significant. There is only 0.01% chance that an *F*-value so large could occur due to noise.

*P* value less than 0.05 indicate that the model terms are significant. Thus, all individual parameters and interactions, other than between temperature and methanol, are significant.

**Table S6** KEGG pathway classification of genes transcribed under optimized and un-optimized conditions

|                                             | Optimized | Un-optimized |
|---------------------------------------------|-----------|--------------|
| <b>Metabolism</b>                           |           |              |
| Carbohydrate metabolism                     | 251       | 250          |
| Energy metabolism                           | 181       | 181          |
| Lipid metabolism                            | 151       | 148          |
| Nucleotide metabolism                       | 151       | 147          |
| Amino acid metabolism                       | 250       | 253          |
| Metabolism of other amino acids             | 78        | 77           |
| Glycan biosynthesis and metabolism          | 93        | 91           |
| Metabolism of cofactors and vitamins        | 184       | 185          |
| Metabolism of terpenoids and polyketides    | 38        | 38           |
| Biosynthesis of other secondary metabolites | 41        | 41           |
| Xenobiotics biodegradation and metabolism   | 35        | 35           |
| <b>Genetic Information Processing</b>       |           |              |
| Transcription                               | 186       | 185          |
| Translation                                 | 404       | 404          |
| Folding, sorting and degradation            | 350       | 345          |
| Replication and repair                      | 132       | 133          |
| <b>Environmental Information Processing</b> |           |              |
| Membrane transport                          | 16        | 16           |
| Signal transduction                         | 346       | 345          |
| <b>Cellular Processes</b>                   |           |              |
| Transport and catabolism                    | 374       | 371          |
| Cell growth and death                       | 264       | 261          |

**Table S7** A comparison of the up- and down- regulated genes obtained from studies involving methanol metabolism [54], temperature [65] and present study.

|                                |                                                          | METHANOL [54]            | TEMPERATURE [65]         | OPTIMIZED/UN-OPTIMIZED MEDIUM (Present study) |
|--------------------------------|----------------------------------------------------------|--------------------------|--------------------------|-----------------------------------------------|
| <b>METABOLIC PATHWAYS</b>      | <b>GENE NAME (Function)</b>                              | <b>LOG<sub>2</sub>FC</b> | <b>LOG<sub>2</sub>FC</b> | <b>LOG<sub>2</sub>FC</b>                      |
| <b>Methanol metabolism</b>     | AOX2: Alcohol oxidase1                                   | 3.5                      | -0.82                    | 3.5                                           |
|                                | AOX1 :Alcohol Oxidase                                    | 5.32                     | -                        | 1.09                                          |
|                                | FLD: Flavodoxin reductase                                | 2.87                     | -                        | -                                             |
|                                | FGH: S-formyl glutathione                                | 3.46                     | -                        | 0.85                                          |
|                                | FDH: Formate dehydrogenase                               | 3.33                     | -                        | 1.13                                          |
|                                | CAT: Catalase1                                           | 1.88                     | -                        | 2.02                                          |
|                                | DAS: Dihydroxy acetone synthase                          | 6.68                     | -                        | 1.25                                          |
|                                | FLD1: S-hydroxymethyl glutathione dehydrogenase          | -                        | -                        | 1.5                                           |
|                                | DAK: dihydroxyacetone kinase                             | 2.79                     | -                        | 2.46                                          |
|                                | FBP; Fructose1,6 bisphosphate                            | 1.81                     | -                        | 1.17                                          |
|                                | MOX: Methanol oxidase                                    | -                        | -                        | 2.34                                          |
| <b>Energy metabolism</b>       | ACO1: Aconitate hydratase                                | -                        | -0.45                    | -                                             |
|                                | ACS1: Acetyl CoA synthetase                              | -                        | -0.51                    | -1.12                                         |
|                                | ALD4: Aldehyde dehydrogenase 1                           | -                        | -0.45                    | 4.08                                          |
|                                | CIT1: Citrate synthase                                   | -                        | -0.92                    | 1.09                                          |
| <b>Glycolysis</b>              | HEX: Hexokinase                                          | -                        | -                        | 1.17                                          |
|                                | ADHP: Alcohol dehydrogenase                              | -                        | -                        | 1.23                                          |
| <b>Pyruvate metabolism</b>     | ALDH: aldehyde dehydrogenase                             | -                        | -                        | 4.08                                          |
| <b>Fatty acid Biosynthesis</b> | ACAA1: Acetyl CoA-Acyltransferase 1                      | -                        | -                        | 1.78                                          |
|                                | FUM1: Fumarase                                           | -                        | -0.42                    | -                                             |
|                                | ICL1: Isocitrate lyase                                   | -                        | -0.42                    | -0.37                                         |
|                                | MDH1: Malate dehydrogenase                               | -                        | -0.60                    | -0.94                                         |
|                                | LPD1: Dihydrolipoamide dehydrogenase                     | -                        | -0.62                    | -                                             |
| <b>Glycerol metabolism</b>     | GUT1: Glycerol kinase1                                   | -3.8                     | 0.47                     | -1.17                                         |
|                                | GUT2 :Glycerol kinase                                    | -2.74                    | -                        | -1.25                                         |
|                                | STL1: Glucose inactivated glycerol proton symporter STL1 | -0.99                    | -                        | -0.13                                         |
| <b>Oxidative stress</b>        | CCP1: Cytochrome C peroxidase                            | -1.81                    | 0.79                     | -                                             |
|                                | CAT1: Catalase 1                                         | -3.33                    | 1.88                     | -                                             |
|                                | YFL054C: aquaglyceroporin related protein                | -2.99                    | -                        | -                                             |

|                                                 |                                                       |       |       |       |
|-------------------------------------------------|-------------------------------------------------------|-------|-------|-------|
| <b>PEROXISOME BIOSYNTHESIS</b>                  | PEX1: Peroxin 1                                       | 1.15  | -     | 1.2   |
|                                                 | PEX2: Peroxin 2                                       | 2.63  | -     | -     |
|                                                 | PEX3: Peroxin 3                                       | 1.4   | -     | -     |
|                                                 | PEX4: Peroxin 4                                       | 0.63  | -     | 1.75  |
|                                                 | PEX5: Peroxin 5                                       | 2.88  | -     | -     |
|                                                 | PEX6: Peroxin 6                                       | 2.15  | -     | -     |
|                                                 | PEX7: Peroxin 7                                       | -     | -     | -     |
|                                                 | PEX8: Peroxin 8                                       | 1.64  | -     | -     |
|                                                 | PEX11: Peroxin 11                                     | 3.58  | -     | -     |
|                                                 | PEX12: Peroxin 12                                     | 2.19  | -     | -     |
|                                                 | PEX13: Peroxin 13                                     | 2.54  | -     | -     |
|                                                 | PEX14: Peroxin 14                                     | 1.51  | -     | -     |
|                                                 | PEX19: Peroxin 15                                     | 0.86  | -     | -     |
|                                                 | PEX25: Peroxin 25                                     | 0.93  | -     | -     |
|                                                 | PEX28: Peroxin 28                                     | -     | -     | -     |
|                                                 | PEX29: Peroxin 29                                     | -     | -     | -1.07 |
|                                                 | PXA: peroxisomal long chain fatty acid import protein | -     | -     | 1.09  |
| <b>Nitrogen metabolism</b>                      | GS: Glutamine synthetase                              | -     | -     | 1.43  |
|                                                 | GOGAT: Glutamate synthetase                           | -     | -     | 1.23  |
| <b>Amino acid metabolism</b>                    | AGX1: Ala-glyoxylate amino transferase                | -     | -0.58 | -     |
|                                                 | GDH1: Glutamate dehydrogenase #1                      | -     | 0.73  | 1.14  |
|                                                 | GDH2: Glutamate dehydrogenase #2                      | -     | 0.72  | 1.29  |
|                                                 | ILV5: Aceto-hydroxy acid reducto-merase               | -     | -0.38 | -     |
|                                                 | MET6: Homocysteine methyltransferase 1                | -     | 0.66  | 0.57  |
|                                                 | MET6: Homocysteine methyltransferase 2                | -     | 0.66  | 0.47  |
|                                                 | SAM2: S-adenosyl methionine synthetase                | -     | -0.32 | -     |
| <b>TRANSCRIPTIONAL/TRANSLATIONAL REGULATION</b> | GAT1: Solute carrier family 6 member 1                | -1.05 | -     | 0.65  |
|                                                 | HAA1: Transcriptional activator 1                     | -0.76 | -     | -0.66 |
|                                                 | RTG1: Retrograde regulator protein1                   | -1.14 | -     | -0.33 |
|                                                 | PHO2: Phosphate transporter regulatory protein        | -1.37 | -     | -0.77 |
|                                                 | CST6: ATF/CREB activator 1                            | -1.09 | -     | -     |

|                                        |                                                      |      |       |       |
|----------------------------------------|------------------------------------------------------|------|-------|-------|
|                                        | EIF3J: Translation initiation factor 3 of subunit J  | -    | -     | -4.08 |
|                                        | EIF4G: Translation initiation factor 4G              | -    | -     | -2.56 |
|                                        | SRP68: signal recognition particle subunit           | -    | -     | -1.89 |
|                                        | EIF4A3: ATP-dependent RNA helicase                   | -    | -     | 1.08  |
| <b>RIBOSOME/RNA BIOGENESIS</b>         | GSP1: GTP binding nuclear protein                    | -    | 0.32  | -     |
| <b>PROTEIN FOLDING/GENE EXPRESSION</b> | HSP31 :Chaperone                                     | -    | -0.55 | -     |
|                                        | HSP60: Chaperone                                     | -    | -0.40 | -     |
|                                        | HSP82: Chaperone                                     | -    | -0.46 | -     |
|                                        | HSP90A: Chaperone                                    | -    | -     | -2.05 |
|                                        | KAR2ER: ATPase BiP                                   | -    | -0.37 | -0.27 |
|                                        | PDI1: Protein disulphide isomerase                   | -    | 0.35  | 0.44  |
|                                        | SSA4 : Secretion helper (SH)                         | -    | -1.40 | -0.94 |
|                                        | SSA4: SH 50kDa                                       | -    | 0.37  | -     |
|                                        | SSA4: SH 25kDa                                       | -    | 0.74  | -     |
|                                        | SSB1: Single strand DNA-binding protein              | -    | -0.99 | -     |
|                                        | SSB1: (50kDa)                                        | -    | 0.80  | -     |
|                                        | SSB1: (25kDa)                                        | -    | 0.77  | -     |
|                                        | SEC 20: Transport protein                            | -    | -     | 2.75  |
|                                        | SEC 23: Transport protein                            | -    | -     | 3.2   |
|                                        | SEC 62: Translocation protein                        | -    | -     | -2.45 |
|                                        | ALG13: $\beta$ -4,-N acetyl glucosaminyl transferase | -    | -     | 2.56  |
|                                        | ALG14: $\beta$ -4,-N acetyl glucosaminyl transferase | -    | -     | -1.23 |
|                                        | GPI7: Ethanolamine phosphotransferase                | -    | -     | -1.49 |
| <b>UBIQUITIN PROTEASOME SYSTEM</b>     | LAP4 : metallo-amino peptidase APE1                  | 1.7  | -     | -1.07 |
|                                        | PEP4: proteinase A                                   | 1.26 | -     | -     |
|                                        | PRB1: proteinase B                                   | 0.86 | -     | -     |
|                                        | YPS2: N-acetyl glucosamine kinase                    | 2.2  | -     | -     |
|                                        | YPS2: : N-acetyl glucosamine kinase                  | 0.91 | -     | -     |
|                                        | YPS3: Prophage ps3 protein01-like protein            | 0.72 | -     | -     |
|                                        | CDC23: Anaphase promoting complex                    | -    | -     | 1.5   |



|  |                                                     |     |   |       |
|--|-----------------------------------------------------|-----|---|-------|
|  | YPS7: Aspartic proteinase<br>Yapsin 7               | 0.6 | - | -0.35 |
|  | SYVN1, HRD1: Ubiquitin<br>protein ligase synoviolin |     |   | -1.13 |
|  | MKC7: Aspartyl protease                             | -   | - | -0.58 |

Red refer to up-regulated genes in the optimized medium while green refer to down-regulated genes
